# Supplementary material for: FARCI: Fast and Robust Connectome Inference
Source: MDPI journal article supplement (doi:10.3390/brainsci11121556), 2021-11-24
Supplement: s1 [file s1]

## Supplementary Materials

### FARCI: Fast and Robust Connectome Inference

Saber Meamardoost<sup>1</sup>, Mahasweta Bhattacharya<sup>2</sup>, Eun Jung Hwang<sup>3,4</sup>, Takaki Komiyama<sup>3</sup>, Claudia Mewes<sup>5</sup>, Linbing Wang<sup>6</sup>, Ying Zhang<sup>7</sup>, Rudiyanto Gunawan<sup>1</sup>

**Table S1. Parameters used to generate *in-silico* datasets using the NAOMi toolbox [1].**

| Parameters                        | 100 Neurons                                                           | 1000 Neurons                                                            | Remarks                                                                |
|-----------------------------------|-----------------------------------------------------------------------|-------------------------------------------------------------------------|------------------------------------------------------------------------|
| Dimensions of neural volume       | 50 $\mu\text{m}$ $\times$ 50 $\mu\text{m}$ $\times$ 150 $\mu\text{m}$ | 300 $\mu\text{m}$ $\times$ 300 $\mu\text{m}$ $\times$ 150 $\mu\text{m}$ | Dimensions are selected to generate approximately 100 and 1000 neurons |
| Imaging depth below surface       | 150 $\mu\text{m}$                                                     | 150 $\mu\text{m}$                                                       | This is a typical depth in calcium imaging experiment                  |
| Number of frames                  | 180K                                                                  | 180K                                                                    | The total frames correspond to 50Hz for a total of 1-hour recording    |
| Imaging rate                      | 50Hz                                                                  | 50Hz                                                                    | The same rate used in the NCC data generation                          |
| Calcium indicator                 | GCaMP6                                                                | GCaMP6                                                                  | Default setting in NAOMi                                               |
| Numerical aperture of objective   | 0.8                                                                   | 0.8                                                                     | Default setting in NAOMi                                               |
| Numerical aperture of excitation  | 0.6                                                                   | 0.6                                                                     | Default setting in NAOMi                                               |
| Power (mW)                        | 40                                                                    | 40                                                                      | Default setting in NAOMi                                               |
| Motion consideration for scanning | 'true'                                                                | 'true'                                                                  | Default setting in NAOMi                                               |

**Table S2. Effect of different signal processing steps on connectome inference.** AUROC and AUPR are reported for small datasets.

|                                             | AUROC        |              |              |              |              |              | AUPR         |              |              |              |              |              |
|---------------------------------------------|--------------|--------------|--------------|--------------|--------------|--------------|--------------|--------------|--------------|--------------|--------------|--------------|
| Filter                                      | small-1      | small-2      | small-3      | small-4      | small-5      | small-6      | small-1      | small-2      | small-3      | small-4      | small-5      | small-6      |
| Spikes<br>$x$                               | 0.781        | 0.827        | 0.872        | 0.901        | 0.907        | 0.938        | 0.412        | 0.460        | 0.516        | 0.592        | 0.609        | 0.667        |
| Spikes<br>+ Binarization<br>$u(x)$          | 0.542        | 0.521        | 0.533        | 0.558        | 0.554        | 0.673        | 0.204        | 0.182        | 0.170        | 0.180        | 0.171        | 0.224        |
| Spikes<br>+ Thresholding<br>$g(x)$          | 0.795        | 0.839        | 0.879        | 0.903        | 0.910        | 0.933        | 0.480        | 0.545        | 0.604        | 0.671        | 0.689        | 0.733        |
| Spikes<br>+ Smoothing<br>$h(x)$             | 0.849        | 0.859        | 0.881        | 0.903        | 0.913        | 0.942        | 0.486        | 0.489        | 0.501        | 0.554        | 0.571        | 0.625        |
| <b>FARCI</b><br><b><math>h(g(x))</math></b> | <b>0.876</b> | <b>0.890</b> | <b>0.910</b> | <b>0.928</b> | <b>0.934</b> | <b>0.960</b> | <b>0.667</b> | <b>0.686</b> | <b>0.700</b> | <b>0.767</b> | <b>0.787</b> | <b>0.838</b> |

**Table S3. Effect of different signal processing steps on connectome inference.** AUROC and AUPR are reported for normal datasets.

|                                             | AUROC        |              |              |              | AUPR         |              |              |              |
|---------------------------------------------|--------------|--------------|--------------|--------------|--------------|--------------|--------------|--------------|
| Filter                                      | normal-1     | normal-2     | normal-3     | normal-4     | normal-1     | normal-2     | normal-3     | normal-4     |
| Spikes<br>$x$                               | 0.891        | 0.894        | 0.892        | 0.889        | 0.334        | 0.337        | 0.342        | 0.329        |
| Spikes<br>+ Binarization<br>$u(x)$          | 0.656        | 0.655        | 0.655        | 0.643        | 0.042        | 0.043        | 0.044        | 0.040        |
| Spikes<br>+ Thresholding<br>$g(x)$          | 0.878        | 0.885        | 0.884        | 0.880        | 0.395        | 0.413        | 0.422        | 0.403        |
| Spikes<br>+ Smoothing<br>$h(x)$             | 0.910        | 0.909        | 0.910        | 0.906        | 0.336        | 0.327        | 0.332        | 0.327        |
| <b>FARCI</b><br><b><math>h(g(x))</math></b> | <b>0.907</b> | <b>0.909</b> | <b>0.910</b> | <b>0.905</b> | <b>0.490</b> | <b>0.491</b> | <b>0.495</b> | <b>0.488</b> |

**Table S4. Effect of different signal processing steps on connectome inference.**

| Filter                             | AUROC                  |                        |              |              |              |              | AUPR                   |                        |              |              |              |              |
|------------------------------------|------------------------|------------------------|--------------|--------------|--------------|--------------|------------------------|------------------------|--------------|--------------|--------------|--------------|
|                                    | normal-3<br>(highrate) | normal-4<br>(lownoise) | highcc       | lowcc        | highcon      | lowcon       | normal-3<br>(highrate) | normal-4<br>(lownoise) | highcc       | lowcc        | highcon      | lowcon       |
| Spikes<br>$x$                      | 0.937                  | 0.919                  | 0.907        | 0.870        | 0.867        | 0.930        | 0.409                  | 0.366                  | 0.416        | 0.233        | 0.321        | 0.334        |
| Spikes<br>+ Binarization<br>$u(x)$ | 0.742                  | 0.625                  | 0.707        | 0.569        | 0.579        | 0.660        | 0.091                  | 0.039                  | 0.054        | 0.028        | 0.046        | 0.044        |
| Spikes<br>+ Thresholding<br>$g(x)$ | 0.935                  | 0.914                  | 0.900        | 0.859        | 0.835        | 0.927        | 0.533                  | 0.507                  | 0.509        | 0.271        | 0.298        | 0.407        |
| Spikes<br>+ Smoothing<br>$h(x)$    | 0.945                  | 0.913                  | 0.912        | 0.888        | 0.894        | 0.949        | 0.405                  | 0.337                  | 0.392        | 0.255        | 0.334        | 0.350        |
| <b>FARCI</b><br>$h(g(x))$          | <b>0.953</b>           | <b>0.915</b>           | <b>0.916</b> | <b>0.892</b> | <b>0.875</b> | <b>0.956</b> | <b>0.602</b>           | <b>0.532</b>           | <b>0.575</b> | <b>0.380</b> | <b>0.368</b> | <b>0.525</b> |

**Table S5. Alternative smoothing functions.** Smoothing functions  $F_1$  to  $F_4$  are obtained from [2].

|                                                                                          |
|------------------------------------------------------------------------------------------|
| Gaussian filter:                                                                         |
| $f(y_i, t) = \frac{1}{\sqrt{2\pi}\sigma} e^{-\frac{y_i^{t^2}}{2\sigma^2}}, \sigma = 0.5$ |
| $f_1(y_i, t) = y_i^{t-1} + y_i^t + y_i^{t+1}$                                            |
| $f_2(y_i, t) = 0.4y_i^{t-3} + 0.6y_i^{t-2} + 0.8y_i^{t-1} + y_i$                         |
| $f_3(y_i, t) = y_i^{t-1} + y_i^t + y_i^{t+1} + y_i^{t+2}$                                |
| $f_4(y_i, t) = y_i^t + y_i^{t+1} + y_i^{t+2} + y_i^{t+3}$                                |

**Table S6. Performance comparison using different smoothing functions.** The smoothing functions are provided in Supplementary Table S5. The window size for moving average is 5 frames.

|                  | FARCI |       | Gaussian filter |       | Moving Average |       | F1 filter |       | F2 filter |       | F3 filter |       | F4 filter |       | Sutera <i>et al.</i> (2015) |       |
|------------------|-------|-------|-----------------|-------|----------------|-------|-----------|-------|-----------|-------|-----------|-------|-----------|-------|-----------------------------|-------|
|                  | AUROC | AUPR  | AUROC           | AUPR  | AUROC          | AUPR  | AUROC     | AUPR  | AUROC     | AUPR  | AUROC     | AUPR  | AUROC     | AUPR  | AUROC                       | AUPR  |
| small1           | 0.876 | 0.667 | 0.784           | 0.418 | 0.867          | 0.644 | 0.864     | 0.625 | 0.865     | 0.629 | 0.867     | 0.638 | 0.867     | 0.638 | 0.720                       | 0.401 |
| small2           | 0.890 | 0.686 | 0.827           | 0.465 | 0.883          | 0.662 | 0.884     | 0.660 | 0.884     | 0.659 | 0.885     | 0.663 | 0.885     | 0.663 | 0.791                       | 0.490 |
| small3           | 0.910 | 0.700 | 0.859           | 0.496 | 0.905          | 0.684 | 0.909     | 0.686 | 0.908     | 0.685 | 0.908     | 0.687 | 0.908     | 0.687 | 0.859                       | 0.598 |
| small4           | 0.928 | 0.767 | 0.878           | 0.523 | 0.926          | 0.757 | 0.928     | 0.755 | 0.927     | 0.756 | 0.927     | 0.758 | 0.927     | 0.758 | 0.895                       | 0.717 |
| small5           | 0.934 | 0.787 | 0.892           | 0.544 | 0.933          | 0.778 | 0.933     | 0.770 | 0.933     | 0.773 | 0.933     | 0.777 | 0.933     | 0.777 | 0.919                       | 0.751 |
| small6           | 0.960 | 0.838 | 0.914           | 0.572 | 0.960          | 0.831 | 0.958     | 0.816 | 0.959     | 0.821 | 0.960     | 0.827 | 0.960     | 0.827 | 0.960                       | 0.845 |
| normal1          | 0.907 | 0.490 | 0.888           | 0.319 | 0.905          | 0.482 | 0.912     | 0.487 | 0.912     | 0.487 | 0.910     | 0.487 | 0.910     | 0.487 | 0.943                       | 0.403 |
| normal2          | 0.909 | 0.491 | 0.892           | 0.324 | 0.909          | 0.483 | 0.916     | 0.495 | 0.916     | 0.495 | 0.914     | 0.492 | 0.914     | 0.492 | 0.942                       | 0.404 |
| normal3          | 0.910 | 0.495 | 0.892           | 0.329 | 0.908          | 0.488 | 0.916     | 0.498 | 0.915     | 0.498 | 0.913     | 0.496 | 0.913     | 0.496 | 0.942                       | 0.398 |
| normal4          | 0.905 | 0.488 | 0.890           | 0.320 | 0.904          | 0.480 | 0.912     | 0.488 | 0.911     | 0.488 | 0.909     | 0.487 | 0.909     | 0.487 | 0.939                       | 0.388 |
| normal3-highrate | 0.953 | 0.602 | 0.940           | 0.422 | 0.949          | 0.590 | 0.958     | 0.607 | 0.957     | 0.604 | 0.954     | 0.601 | 0.954     | 0.601 | 0.961                       | 0.452 |
| normal4-lownoise | 0.915 | 0.532 | 0.917           | 0.383 | 0.912          | 0.523 | 0.926     | 0.550 | 0.923     | 0.544 | 0.919     | 0.538 | 0.919     | 0.538 | 0.941                       | 0.432 |
| highcc           | 0.916 | 0.575 | 0.905           | 0.390 | 0.915          | 0.568 | 0.923     | 0.576 | 0.922     | 0.575 | 0.919     | 0.574 | 0.919     | 0.574 | 0.946                       | 0.486 |
| lowcc            | 0.892 | 0.380 | 0.872           | 0.243 | 0.890          | 0.367 | 0.900     | 0.380 | 0.899     | 0.379 | 0.896     | 0.377 | 0.896     | 0.377 | 0.925                       | 0.260 |
| highcon          | 0.875 | 0.368 | 0.846           | 0.283 | 0.874          | 0.364 | 0.880     | 0.383 | 0.881     | 0.382 | 0.879     | 0.378 | 0.879     | 0.378 | 0.944                       | 0.413 |
| Lowcon           | 0.956 | 0.525 | 0.937           | 0.296 | 0.954          | 0.512 | 0.961     | 0.520 | 0.960     | 0.520 | 0.959     | 0.519 | 0.959     | 0.519 | 0.955                       | 0.334 |

**Table S7. Comparison of FARCI performance with Sutera *et al.* (2015), GTE and FluoroSNNAP on all the datasets provided in Neural Connectomics Challenge.**

|                  | FARCI |       | Sutera <i>et al.</i> (2015) |       | Generalized Transfer Entropy |       | FluoroSNNAP |       |
|------------------|-------|-------|-----------------------------|-------|------------------------------|-------|-------------|-------|
|                  | AUROC | AUPR  | AUROC                       | AUPR  | AUROC                        | AUPR  | AUROC       | AUPR  |
| small1           | 0.876 | 0.667 | 0.720                       | 0.401 | 0.648                        | 0.308 | 0.534       | 0.201 |
| small2           | 0.890 | 0.686 | 0.791                       | 0.490 | 0.709                        | 0.379 | 0.518       | 0.181 |
| small3           | 0.910 | 0.700 | 0.859                       | 0.598 | 0.787                        | 0.458 | 0.527       | 0.165 |
| small4           | 0.928 | 0.767 | 0.895                       | 0.717 | 0.824                        | 0.559 | 0.526       | 0.165 |
| small5           | 0.934 | 0.787 | 0.919                       | 0.751 | 0.880                        | 0.605 | 0.526       | 0.157 |
| small6           | 0.960 | 0.838 | 0.960                       | 0.845 | 0.919                        | 0.623 | 0.534       | 0.154 |
| normal1          | 0.907 | 0.490 | 0.943                       | 0.403 | 0.874                        | 0.230 | 0.527       | 0.022 |
| normal2          | 0.909 | 0.491 | 0.942                       | 0.404 | 0.879                        | 0.241 | 0.530       | 0.022 |
| normal3          | 0.910 | 0.495 | 0.942                       | 0.398 | 0.876                        | 0.258 | 0.528       | 0.022 |
| normal4          | 0.905 | 0.488 | 0.939                       | 0.388 | 0.856                        | 0.200 | 0.530       | 0.022 |
| normal3-highrate | 0.953 | 0.602 | 0.961                       | 0.452 | 0.888                        | 0.266 | 0.532       | 0.022 |
| normal4-lownoise | 0.915 | 0.532 | 0.941                       | 0.432 | 0.863                        | 0.209 | 0.529       | 0.022 |
| highcc           | 0.916 | 0.575 | 0.946                       | 0.486 | 0.878                        | 0.234 | 0.534       | 0.022 |
| lowcc            | 0.892 | 0.380 | 0.925                       | 0.260 | 0.840                        | 0.137 | 0.516       | 0.023 |
| highcon          | 0.875 | 0.368 | 0.944                       | 0.413 | 0.898                        | 0.290 | 0.515       | 0.037 |
| lowcon           | 0.956 | 0.525 | 0.955                       | 0.334 | 0.700                        | 0.113 | 0.544       | 0.015 |

**Table S8. Comparison of FARCI performance with Sutera *et al.* (2015), GTE and FluoroSNNAP on all the datasets generated using NAOMi Toolbox [1].**

|          |         | FARCI |       | Sutera <i>et al.</i> (2015) |       | Generalized Transfer Entropy |       | FluoroSNNAP |       |
|----------|---------|-------|-------|-----------------------------|-------|------------------------------|-------|-------------|-------|
|          | Neurons | AUROC | AUPR  | AUROC                       | AUPR  | AUROC                        | AUPR  | AUROC       | AUPR  |
| naomi-1  | 106     | 0.854 | 0.622 | 0.776                       | 0.450 | 0.706                        | 0.368 | 0.508       | 0.178 |
| naomi-2  | 118     | 0.827 | 0.555 | 0.806                       | 0.469 | 0.625                        | 0.226 | 0.520       | 0.162 |
| naomi-3  | 102     | 0.860 | 0.638 | 0.721                       | 0.407 | 0.651                        | 0.309 | 0.534       | 0.202 |
| naomi-4  | 113     | 0.829 | 0.545 | 0.788                       | 0.429 | 0.719                        | 0.331 | 0.500       | 0.155 |
| naomi-5  | 104     | 0.854 | 0.602 | 0.858                       | 0.556 | 0.651                        | 0.230 | 0.514       | 0.158 |
| naomi-6  | 1016    | 0.870 | 0.426 | 0.918                       | 0.458 | 0.871                        | 0.220 | 0.514       | 0.021 |
| naomi-7  | 1023    | 0.850 | 0.432 | 0.885                       | 0.463 | 0.861                        | 0.209 | 0.510       | 0.020 |
| naomi-8  | 1009    | 0.850 | 0.372 | 0.850                       | 0.333 | 0.805                        | 0.171 | 0.515       | 0.021 |
| naomi-9  | 1027    | 0.870 | 0.418 | 0.910                       | 0.439 | 0.855                        | 0.192 | 0.514       | 0.021 |
| naomi-10 | 1013    | 0.880 | 0.352 | 0.923                       | 0.377 | 0.839                        | 0.137 | 0.509       | 0.023 |

**Table S9. Test of Normality and Equality of Variance.** The tests were done to check normality and equality of variance assumptions for the differences in AUROCs and AUPRs for FARCI vs. Sutura *et al.*, FARCI vs. GTE, and FARCI vs. FluoroSNNAP. The normality test was done using a one-sample Kolmogorov-Smirnov (KS) test using the `kstest` function in MATLAB [3]. The constant variance test was done in 10 replicates using two-sample F-test applied to two random halves of the sample using the `vartest2` in MATLAB [4], to obtain an average  $p$ -value. The results suggest that constant variance assumption generally cannot be rejected at  $p$ -value<0.01. In some cases, among the NCC datasets, normality test can be rejected, particularly for FARCI vs. FluoroSNNAP.

|                                |                               | NCC            |                 |                |                 | NAOMi          |                 |                |                 |
|--------------------------------|-------------------------------|----------------|-----------------|----------------|-----------------|----------------|-----------------|----------------|-----------------|
|                                |                               | AUROC          |                 | AUPR           |                 | AUROC          |                 | AUPR           |                 |
|                                |                               | 100<br>Neurons | 1000<br>Neurons | 100<br>Neurons | 1000<br>Neurons | 100<br>Neurons | 1000<br>Neurons | 100<br>Neurons | 1000<br>Neurons |
| <i>Kolmogorov-Smirnov Test</i> | FARCI vs Sutura <i>et al.</i> | 0.066          | 0.008           | 0.068          | 0.012           | 0.114          | 0.112           | 0.090          | 0.130           |
|                                | FARCI vs GTE                  | 0.051          | 0.010           | 0.022          | 0.004           | 0.064          | 0.117           | 0.037          | 0.040           |
|                                | FARCI vs FluoroSNNAP          | 0.007          | 0.000           | 0.003          | 0.000           | 0.022          | 0.117           | 0.019          | 0.019           |
| <i>F-test</i>                  | FARCI vs Sutura <i>et al.</i> | 0.501          | 0.179           | 0.419          | 0.236           | 0.469          | 0.251           | 0.730          | 0.163           |
|                                | FARCI vs GTE                  | 0.649          | 0.012           | 0.352          | 0.229           | 0.246          | 0.523           | 0.478          | 0.454           |
|                                | FARCI vs FluoroSNNAP          | 0.653          | 0.658           | 0.697          | 0.314           | 0.584          | 0.523           | 0.431          | 0.501           |

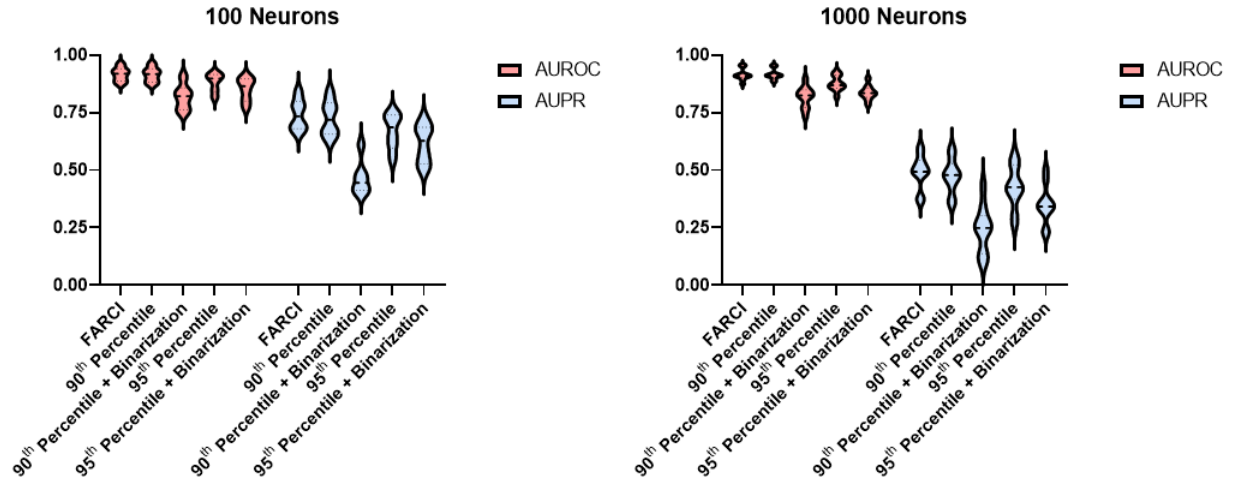

**Figure S1. FARCI performance using spike thresholding based on percentiles (90<sup>th</sup> and 95<sup>th</sup> percentile).** The performance of FARCI was assessed using AUROC and AUPR (see Materials and Methods).



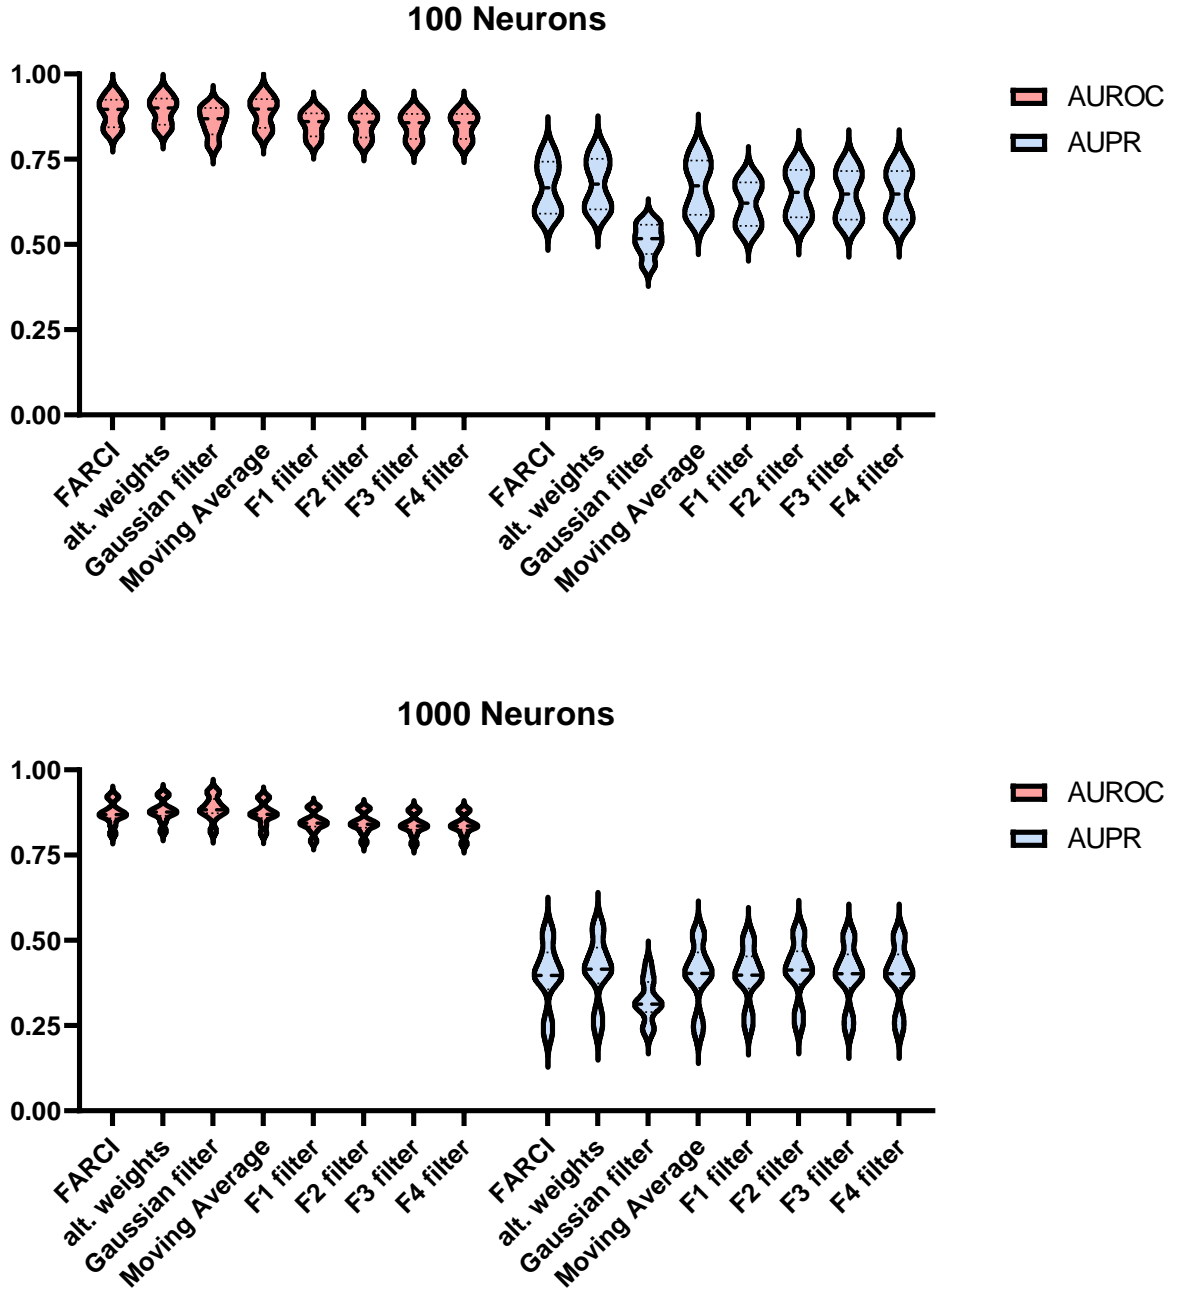

**Figure S2. FARCI performance on downsampled datasets (25Hz).** Alternative weights (alt. weights) refer to a spike smoothing function as follows:  $h(y_i, t) = \frac{1}{5}y_i^{t-2} + \frac{3}{5}y_i^{t-1} + y_i^t + \frac{3}{5}y_i^{t+1} + \frac{1}{5}y_i^{t+2}$ . The window size for moving average is 5. AUROCs and AUPRs for downsampled datasets are expectedly lower than for the original datasets due to the loss of information caused by downsampling. In general, the AUROCs and AUPRs remain relatively high.

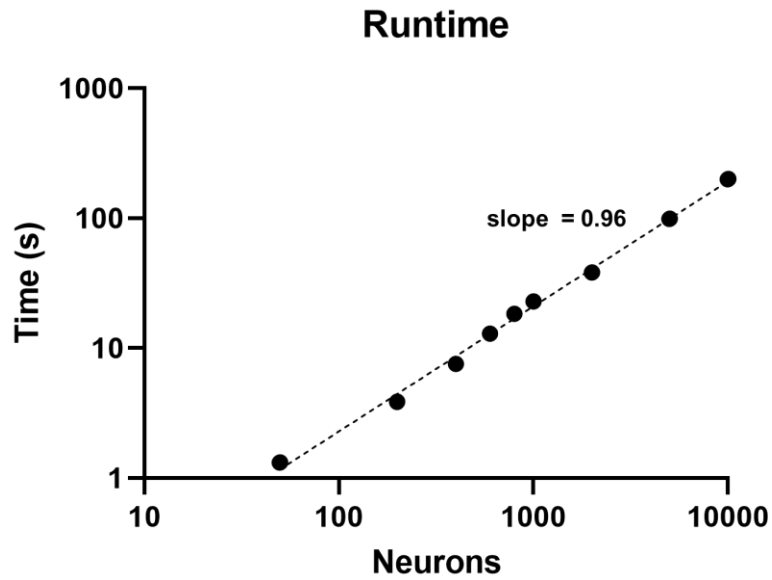

**Figure S3. FARCI average runtimes for connectomes larger than 1000-neuron datasets from the NCC ( $n = 10$ ).** The average runtimes for subsampled networks  $<1000$  neurons were obtained as described in the main text. For connectome larger than 1000 neurons, we combined multiple normal datasets for 1000 neurons to produce datasets of size 2000, 5000, and 10000 neurons. As shown, the computational times scales linearly with the number of neurons.

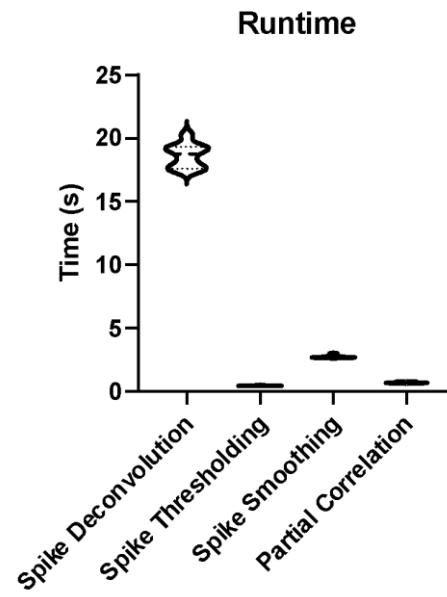

Figure S4. FARCI runtimes for the NCC connectomes with 1000 neurons.

## References

1. Song, A.; Gauthier, J.L.; Pillow, J.W.; Tank, D.W.; Charles, A.S. Neural Anatomy and Optical Microscopy (NAOMi) Simulation for Evaluating Calcium Imaging Methods. *Journal of Neuroscience Methods* 2021, 358, 109173, doi:10.1016/j.jneumeth.2021.109173.
2. Suter, A.; Joly, A.; François-Lavet, V.; Qiu, Z.A.; Louppe, G.; Ernst, D.; Geurts, P.; Battaglia, D.; Guyon, I.; Lemaire, V.; et al. *Simple Connectome Inference from Partial Correlation Statistics in Calcium Imaging*; 2015; Vol. 46;.
3. One-Sample Kolmogorov-Smirnov Test - MATLAB Kstest - MathWorks Switzerland Available online: <https://ch.mathworks.com/help/stats/kstest.html> (accessed on 9 September 2021).
4. Two-Sample F-Test for Equal Variances - MATLAB Vartest2 - MathWorks Switzerland Available online: <https://ch.mathworks.com/help/stats/vartest2.html> (accessed on 9 September 2021).
